# Supplementary material for: Diurnal versus spatial variability of greenhouse gas emissions from an anthropogenic modified German lowland river
Source: Copernicus journal article supplement (doi:10.5194/bg-2023-176), 2023-09-25
Supplement: Supplementary file 1 [file bg-2023-176-supplement.zip]

# Supplemental Information

## Diurnal versus spatial variability of greenhouse gas emissions from an anthropogenic modified German lowland river

5 Matthias Koschorreck<sup>1</sup>, Norbert Kamjunke<sup>2</sup>, Uta Koedel<sup>3</sup>, Michael Rode<sup>4</sup>, Claudia Schuetze<sup>3</sup>, Ingeborg Bussmann<sup>5</sup>

<sup>1</sup>Department Lake Research, Helmholtz Zentrum für Umweltforschung, Magdeburg, Germany

<sup>2</sup>Department River Ecology, Helmholtz Zentrum für Umweltforschung, Magdeburg, Germany

<sup>3</sup>Department Monitoring & Exploration Technologies, Helmholtz Zentrum für Umweltforschung, Leipzig, Germany

10 <sup>4</sup>Department Aquatic Ecosystem Analysis, Helmholtz Zentrum für Umweltforschung, Magdeburg, Germany

<sup>5</sup>Departments Shelf Sea System Ecology, Alfred Wegener Institut, Helmholtz Zentrum für Polar- und Meeresforschung, Helgoland, Germany

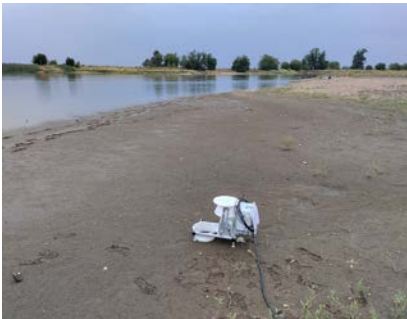

muddy site / soil flux chamber C2

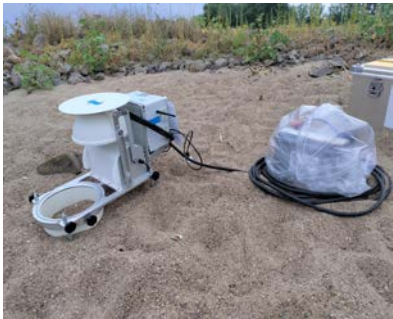

sandy site / soil flux chamber C1

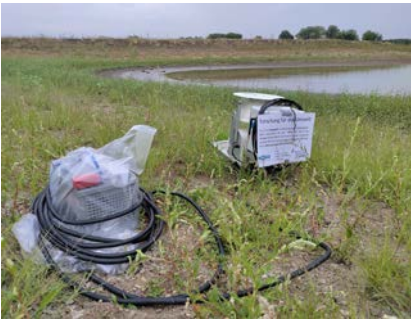

vegetated site / soil flux chamber C3

15 **Figure S1: Photographs of automatic flux chambers in dry habitat types.**

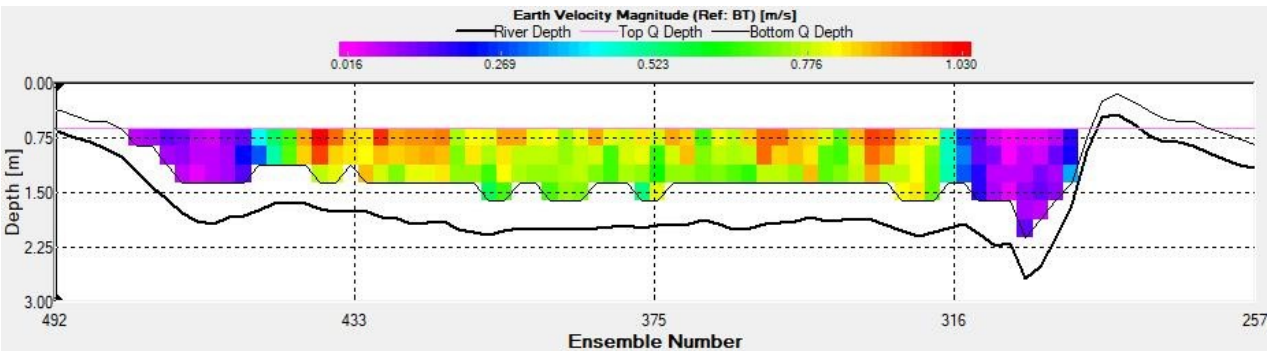

20 **Figure S2: Example of ADCP contour map of flow velocity in a river cross section of the study reach.**

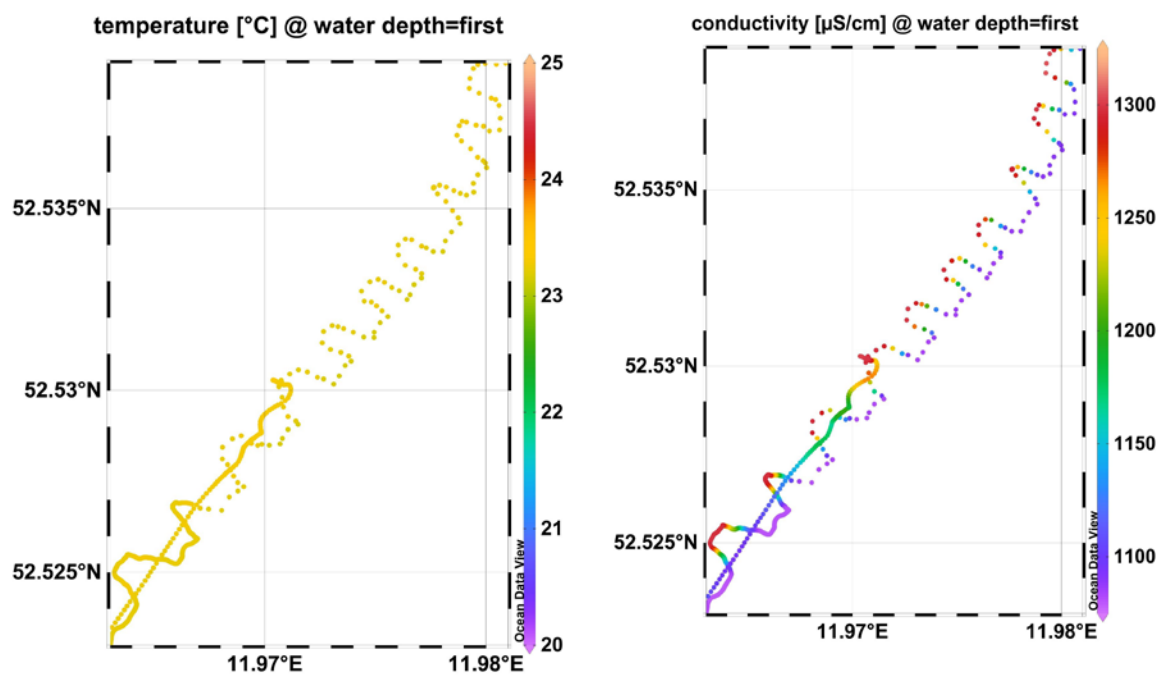

Figure S3: Water temperature and conductivity along the Elbe, on 19.8.2022 in the same area as shown in Figure 1c.

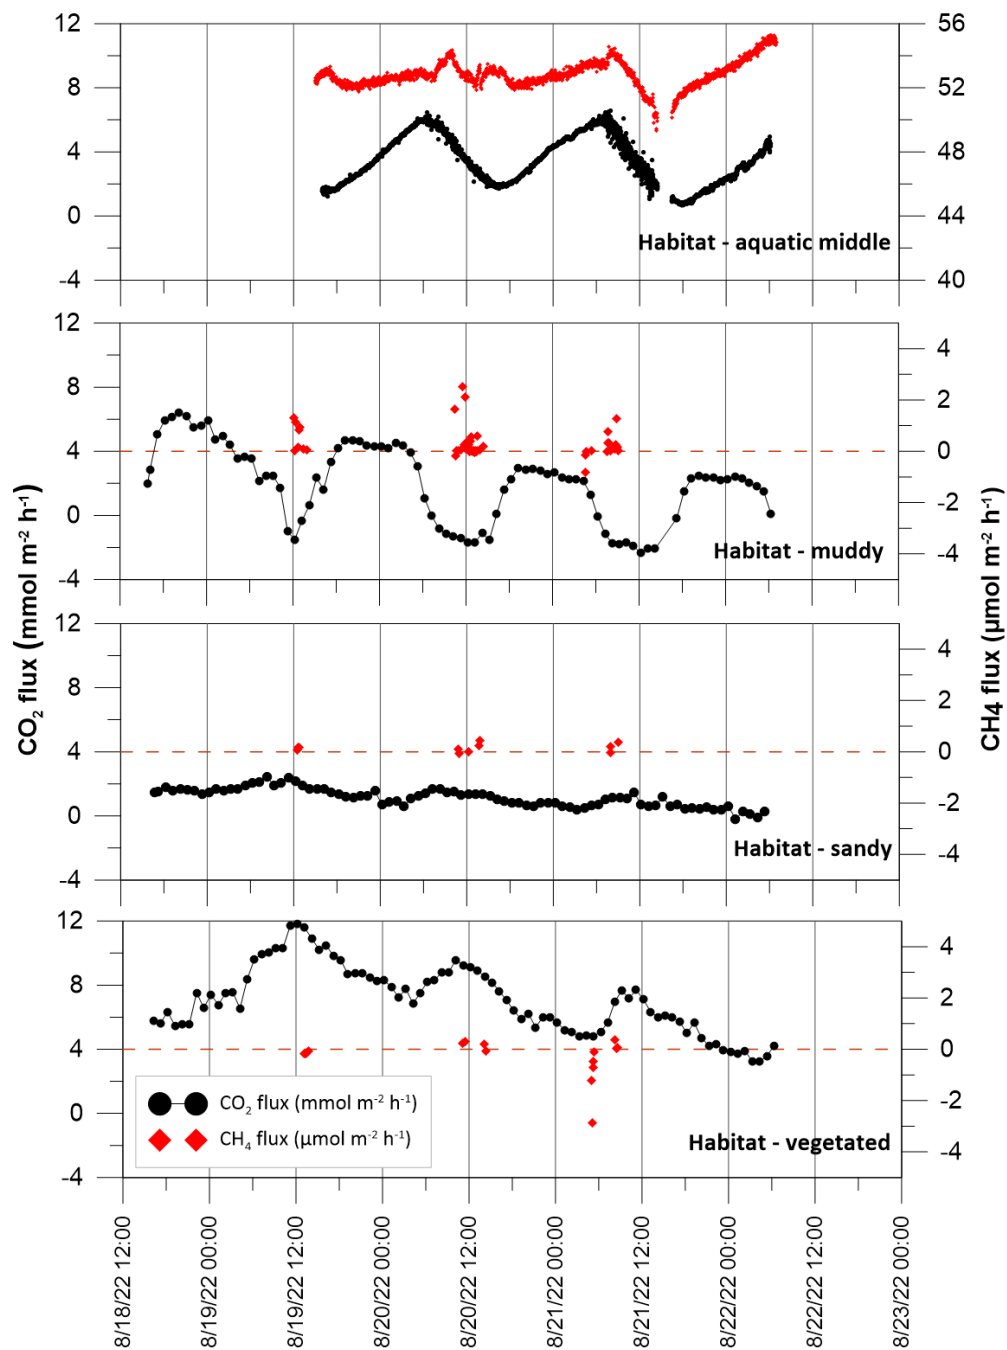

**Figure S4: Time series of CO<sub>2</sub> flux (black) and CH<sub>4</sub> flux (red) at different sites: (a) aquatic side (b) dry sand (c) dry mud (d) dry vegetated. Aquatic fluxes calculated from concentration data, dry fluxes directly measured with chambers. Note different scale for aquatic data. All data are shown.**

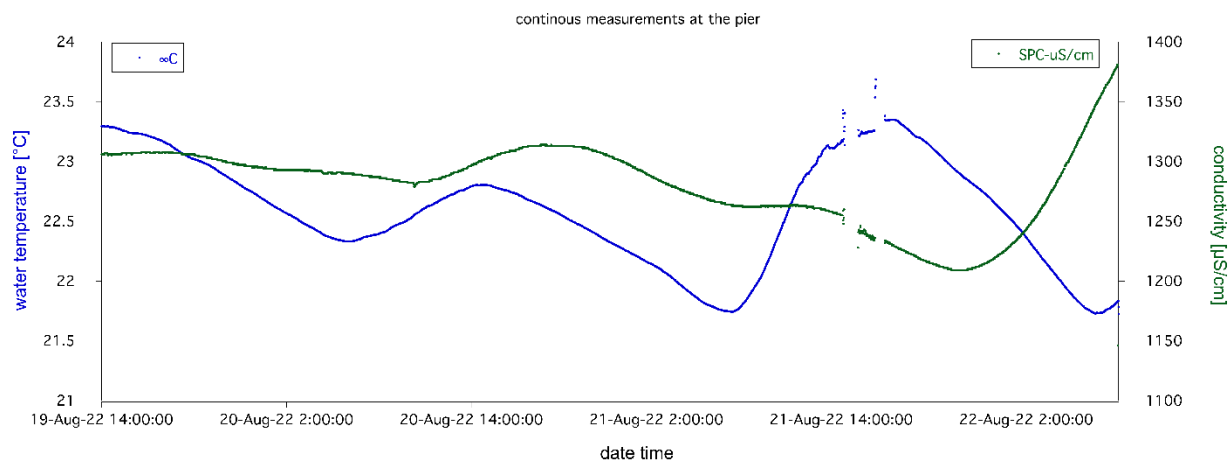

**Figure S5:** Time series of water temperature (blue) and electrical conductivity (green) measured in the moonpool of RV Albis.

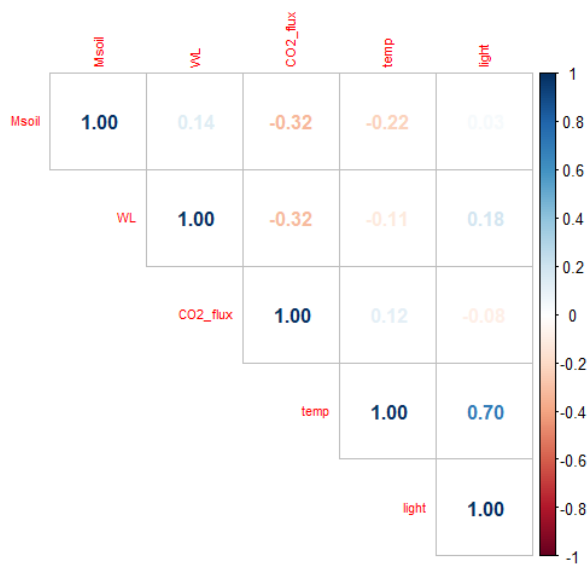

**Fig. S6:** Correlation matrix including CO<sub>2</sub> flux and its potential regulators.

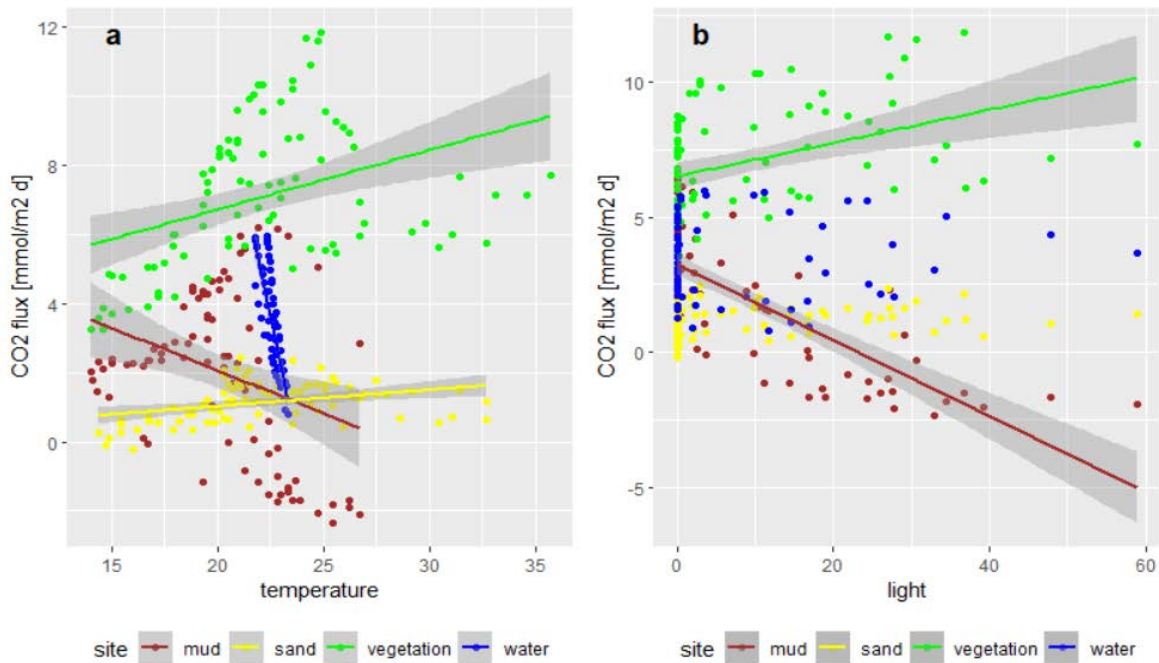

40 **Figure S7: Linear correlation of CO<sub>2</sub> fluxes with temperature, (a) and light  $R_{\text{mud}}=-0.77$ ,  $R_{\text{Sand}}=0.23$ ,  $R_{\text{veg}}=0.38$ ,  $R_{\text{Water}}=0.02$  (b). Lines show linear fit if significant ( $p < 0.05$ ), shaded areas are confidence intervals.**

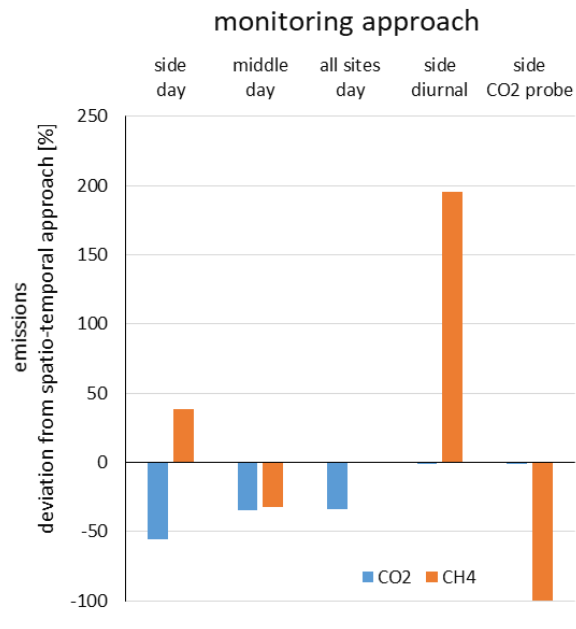

**Figure S8: Deviation of total CO<sub>2</sub> (blue) and CH<sub>4</sub> (red) emissions obtained by different monitoring approaches from perfect approach (both spatial and diurnal variability considered).**
