# Supplementary material for: Diurnal versus spatial variability of greenhouse gas emissions from an anthropogenic modified German lowland river
Source: Copernicus journal article supplement (doi:10.5194/bg-2023-176), 2023-09-25
Supplement: Supplementary file 2 [file bg-2023-176-supplement.zip]

Archive with 2 entries (2 files):
- Koschorreck et al SI.pdf
- Koschorreck et al Time Series data.csv
