# Supplementary material for: Diurnal versus spatial variability of greenhouse gas emissions from an anthropogenic modified German lowland river
Source: Copernicus journal article supplement (doi:10.5194/bg-2023-176), 2023-09-25
Supplement: Supplementary file 2 [file bg-2023-176-supplement.zip › Koschorreck et al Time Series data.csv]

	datetime	site	CO2_flux	CH4_flux	temp	Msoil	light	WL	hour	time_of_day
1	18/08/2022 16:00	mud	2.844	NA	26.7	20.5	15.534062	140.2	16	day
2	18/08/2022 17:00	mud	5.076	NA	24.7	20.2	7.0706524	140	17	day
3	18/08/2022 18:00	mud	5.94	NA	23.3	20.4	1.984103	140	18	day
4	18/08/2022 19:00	mud	6.156	NA	22.8	20.2	0.56933	140	19	day
5	18/08/2022 20:00	mud	6.408	NA	22.4	20.4	-0.0203738	139.2	20	night
6	18/08/2022 21:00	mud	6.192	NA	21.9	20.1	-0.0348574	139	21	night
7	18/08/2022 22:00	mud	5.472	NA	21.1	20.2	-0.0368398	139	22	night
8	18/08/2022 23:00	mud	5.58	NA	21.3	20.3	-0.0405012	139	23	night
9	19/08/2022 00:00	mud	5.94	NA	21.1	20.3	-0.0408924	139	0	night
10	19/08/2022 01:00	mud	4.716	NA	20.5	20.3	-0.0375062	139	1	night
11	19/08/2022 02:00	mud	4.932	NA	20.3	20.3	-0.0394386	139	2	night
12	19/08/2022 03:00	mud	4.392	NA	20.1	20.6	-0.0402256	139	3	night
13	19/08/2022 04:00	mud	3.528	NA	19.7	20.5	-0.0392626	139	4	night
14	19/08/2022 05:00	mud	3.672	NA	19.5	20.4	0.1097552	139	5	night
15	19/08/2022 06:00	mud	3.564	NA	19.5	20.5	1.578905	139	6	day
16	19/08/2022 07:00	mud	2.16	NA	20.3	20.3	2.9497172	138.8	7	day
17	19/08/2022 08:00	mud	2.484	NA	20.3	20.1	2.8499808	139	8	day
18	19/08/2022 09:00	mud	2.484	NA	20.5	20.4	10.0347614	138.6	9	day
19	19/08/2022 10:00	mud	1.692	NA	20.7	19.7	10.4711294	138	10	day
20	19/08/2022 11:00	mud	-1.008	NA	22.8	19.3	27.052506	138	11	day
21	19/08/2022 12:00	mud	-1.512	NA	23	19.8	36.6895724	138.4	12	day
22	19/08/2022 13:00	mud	-0.324	NA	22.4	19.2	30.5633644	138.6	13	day
23	19/08/2022 14:00	mud	0.612	NA	22.4	19.3	29.1873604	138.2	14	day
24	19/08/2022 15:00	mud	2.34	NA	21.9	19.3	27.2628592	138.2	15	day
25	19/08/2022 16:00	mud	1.62	NA	21.9	19.1	14.5026408	138.2	16	day
26	19/08/2022 17:00	mud	3.312	NA	21.5	19.1	5.5984876	138	17	day
27	19/08/2022 18:00	mud	4.176	NA	20.9	19.2	2.2914708	138.2	18	day
28	19/08/2022 19:00	mud	4.68	NA	20.1	19.2	0.585089	138.2	19	day
29	19/08/2022 20:00	mud	4.68	NA	20.1	19.3	-0.0012416	138.4	20	night
30	19/08/2022 21:00	mud	4.644	NA	19.7	19.3	-0.0350566	138.8	21	night
31	19/08/2022 22:00	mud	4.356	NA	19.3	19.3	-0.0394862	139	22	night
32	19/08/2022 23:00	mud	4.284	NA	19.5	19.6	-0.039243	139	23	night
33	20/08/2022 00:00	mud	4.284	NA	19.3	19.5	-0.0365868	139.2	0	night
34	20/08/2022 01:00	mud	4.176	NA	19.1	19.7	-0.0359512	139.8	1	night
35	20/08/2022 02:00	mud	4.5	NA	18.8	19.8	-0.0382364	140	2	night
36	20/08/2022 03:00	mud	4.356	NA	18.8	20	-0.0432838	140.2	3	night
37	20/08/2022 04:00	mud	3.924	NA	18.4	20	-0.0409704	141	4	night
38	20/08/2022 05:00	mud	3.06	NA	18.8	20.3	0.3717996	141	5	night
39	20/08/2022 06:00	mud	1.044	NA	19.7	20.1	3.5435212	141.6	6	day
40	20/08/2022 07:00	mud	-0.036	NA	20.5	20.6	9.7079218	142.2	7	day
41	20/08/2022 08:00	mud	-0.828	NA	21.3	20.7	21.8073544	143	8	day
42	20/08/2022 09:00	mud	-1.152	NA	21.9	21	14.3921964	143	9	day
43	20/08/2022 10:00	mud	-1.332	NA	23.3	21.7	18.5262836	143.6	10	day
44	20/08/2022 11:00	mud	-1.44	NA	23.3	21.8	27.490592	143.8	11	day
45	20/08/2022 12:00	mud	-1.692	NA	23.5	22.4	16.8339132	144	12	day
46	20/08/2022 13:00	mud	-1.692	NA	23.9	22.8	19.0316012	144.8	13	day
47	20/08/2022 14:00	mud	-1.116	NA	23.7	23.2	24.4559656	145	14	day
48	20/08/2022 15:00	mud	-1.512	NA	22.4	29.7	26.110268	145.2	15	day
49	20/08/2022 16:00	mud	0.072	NA	21.7	30	16.5966724	145.4	16	day
50	20/08/2022 17:00	mud	1.584	NA	21.3	30.1	11.3255964	145.2	17	day
51	20/08/2022 18:00	mud	2.268	NA	20.9	30.2	8.820762	146	18	day
52	20/08/2022 19:00	mud	2.952	NA	19.5	30.5	2.1547194	146	19	day
53	20/08/2022 20:00	mud	2.844	NA	18.6	30.9	0.0410806	146.2	20	night
54	20/08/2022 21:00	mud	2.88	NA	18	30.9	-0.036251	146.2	21	night
55	20/08/2022 22:00	mud	2.772	NA	17.5	31	-0.0390228	146.8	22	night
56	20/08/2022 23:00	mud	2.556	NA	17.3	31.3	-0.0387338	147	23	night
57	21/08/2022 00:00	mud	2.664	NA	17	31.8	-0.0436914	147	0	night
58	21/08/2022 01:00	mud	2.376	NA	16.7	32.1	-0.0403614	147	1	night
59	21/08/2022 02:00	mud	2.268	NA	16	32.6	-0.0420904	147.2	2	night
60	21/08/2022 03:00	mud	2.268	NA	15	33	-0.0415088	148	3	night
61	21/08/2022 04:00	mud	2.124	NA	14.6	33.7	-0.0397186	148	4	night
62	21/08/2022 05:00	mud	1.296	NA	14.9	34	0.362922	148	5	night
63	21/08/2022 06:00	mud	-0.072	NA	16.7	34.2	3.718673	148	6	day
64	21/08/2022 07:00	mud	-1.152	NA	19.3	34.1	11.1126308	148	7	day
65	21/08/2022 08:00	mud	-1.728	NA	22.8	34.2	24.402234	148	8	day
66	21/08/2022 09:00	mud	-1.8	NA	25.4	34	34.476492	148	9	day
67	21/08/2022 10:00	mud	-1.692	NA	26.2	34.1	47.753128	148	10	day
68	21/08/2022 11:00	mud	-1.908	NA	26.2	34.3	58.8856152	148	11	day
69	21/08/2022 12:00	mud	-2.34	NA	25.4	34.2	32.954826	148	12	day
70	21/08/2022 13:00	mud	-2.052	NA	24.7	34.3	39.2489636	148	13	day
71	21/08/2022 14:00	mud	-2.088	NA	26.7	33.9	27.70318	148	14	day
72	21/08/2022 17:00	mud	-0.18	NA	22.8	29.4	16.8153128	148	17	day
73	21/08/2022 18:00	mud	1.512	NA	21.3	28.4	11.729076	148	18	day
74	21/08/2022 19:00	mud	2.304	NA	19.5	25.9	1.8557884	148	19	day
75	21/08/2022 20:00	mud	2.448	NA	18.4	25.2	0.0045036	148	20	night
76	21/08/2022 21:00	mud	2.376	NA	17.3	25	-0.041016	148	21	night
77	21/08/2022 22:00	mud	2.34	NA	16.8	24.7	-0.0416294	148	22	night
78	21/08/2022 23:00	mud	2.196	NA	16.5	24.3	-0.0421144	147.6	23	night
79	22/08/2022 00:00	mud	2.232	NA	15.7	23.7	-0.0439384	147	0	night
80	22/08/2022 01:00	mud	2.412	NA	15	23.2	-0.0409612	147	1	night
81	22/08/2022 02:00	mud	2.304	NA	14.4	23.2	-0.0428946	147	2	night
82	22/08/2022 03:00	mud	2.016	NA	14	22.6	-0.0405984	147	3	night
83	22/08/2022 04:00	mud	1.8	NA	14.1	22.2	-0.040203	146.6	4	night
84	22/08/2022 05:00	mud	1.476	NA	14.3	22	0.2316998	146	5	night
85	22/08/2022 06:00	mud	0.108	NA	16.5	21.6	2.4908548	146	6	day
86	18/08/2022 17:00	sand	1.512	NA	31.4	1	7.0706524	140	17	day
87	18/08/2022 18:00	sand	1.764	NA	27.5	1	1.984103	140	18	day
88	18/08/2022 19:00	sand	1.584	NA	26.2	1	0.56933	140	19	day
89	18/08/2022 20:00	sand	1.692	NA	25.6	1	-0.0203738	139.2	20	night
90	18/08/2022 21:00	sand	1.62	NA	24.2	1	-0.0348574	139	21	night
91	18/08/2022 22:00	sand	1.584	NA	22.8	1.3	-0.0368398	139	22	night
92	18/08/2022 23:00	sand	1.368	NA	22.4	1.3	-0.0405012	139	23	night
93	19/08/2022 00:00	sand	1.476	NA	22.1	1.5	-0.0408924	139	0	night
94	19/08/2022 01:00	sand	1.656	NA	21.5	0	-0.0375062	139	1	night
95	19/08/2022 02:00	sand	1.584	NA	21.1	0	-0.0394386	139	2	night
96	19/08/2022 03:00	sand	1.692	NA	20.9	1.7	-0.0402256	139	3	night
97	19/08/2022 04:00	sand	1.656	NA	20.5	1	-0.0392626	139	4	night
98	19/08/2022 05:00	sand	1.908	NA	20.3	1	0.1097552	139	5	night
99	19/08/2022 06:00	sand	2.052	NA	20.3	1	1.578905	139	6	day
100	19/08/2022 07:00	sand	2.124	NA	20.9	1.1	2.9497172	138.8	7	day
101	19/08/2022 08:00	sand	2.448	NA	21.1	1.3	2.8499808	139	8	day
102	19/08/2022 09:00	sand	1.908	NA	21.3	1.5	10.0347614	138.6	9	day
103	19/08/2022 10:00	sand	2.052	NA	21.5	0	10.4711294	138	10	day
104	19/08/2022 11:00	sand	2.376	NA	23.5	0	27.052506	138	11	day
105	19/08/2022 12:00	sand	2.16	NA	24.9	0	36.6895724	138.4	12	day
106	19/08/2022 13:00	sand	1.872	NA	25.4	0	30.5633644	138.6	13	day
107	19/08/2022 14:00	sand	1.656	NA	25.1	0	29.1873604	138.2	14	day
108	19/08/2022 15:00	sand	1.656	NA	24.7	0	27.2628592	138.2	15	day
109	19/08/2022 16:00	sand	1.656	NA	24.4	0	14.5026408	138.2	16	day
110	19/08/2022 17:00	sand	1.44	NA	23.9	0	5.5984876	138	17	day
111	19/08/2022 18:00	sand	1.368	NA	23.3	0	2.2914708	138.2	18	day
112	19/08/2022 19:00	sand	1.188	NA	21.9	0	0.585089	138.2	19	day
113	19/08/2022 20:00	sand	1.152	NA	21.7	0	-0.0012416	138.4	20	night
114	19/08/2022 21:00	sand	1.26	NA	21.3	0	-0.0350566	138.8	21	night
115	19/08/2022 22:00	sand	1.224	NA	20.7	0	-0.0394862	139	22	night
116	19/08/2022 23:00	sand	1.548	NA	20.7	0	-0.039243	139	23	night
117	20/08/2022 00:00	sand	0.684	NA	20.3	0	-0.0365868	139.2	0	night
118	20/08/2022 01:00	sand	0.864	NA	20.1	0	-0.0359512	139.8	1	night
119	20/08/2022 02:00	sand	0.936	NA	19.7	0	-0.0382364	140	2	night
120	20/08/2022 03:00	sand	0.576	NA	19.5	0	-0.0432838	140.2	3	night
121	20/08/2022 04:00	sand	1.08	NA	19.3	1.3	-0.0409704	141	4	night
122	20/08/2022 05:00	sand	1.224	NA	19.5	1.3	0.3717996	141	5	night
123	20/08/2022 06:00	sand	1.404	NA	20.3	1.3	3.5435212	141.6	6	day
124	20/08/2022 07:00	sand	1.656	NA	21.1	1.6	9.7079218	142.2	7	day
125	20/08/2022 08:00	sand	1.656	NA	21.9	0	21.8073544	143	8	day
126	20/08/2022 09:00	sand	1.476	NA	23.5	0	14.3921964	143	9	day
127	20/08/2022 10:00	sand	1.512	NA	25.1	0	18.5262836	143.6	10	day
128	20/08/2022 11:00	sand	1.296	NA	26.4	0	27.490592	143.8	11	day
129	20/08/2022 12:00	sand	1.368	NA	26.9	0	16.8339132	144	12	day
130	20/08/2022 13:00	sand	1.368	NA	27.5	0	19.0316012	144.8	13	day
131	20/08/2022 14:00	sand	1.368	NA	28	0	24.4559656	145	14	day
132	20/08/2022 15:00	sand	1.26	NA	26.7	0	26.110268	145.2	15	day
133	20/08/2022 16:00	sand	1.044	NA	25.4	0	16.5966724	145.4	16	day
134	20/08/2022 17:00	sand	0.9	NA	24.7	1.6	11.3255964	145.2	17	day
135	20/08/2022 18:00	sand	0.828	NA	23.7	1.6	8.820762	146	18	day
136	20/08/2022 19:00	sand	0.792	NA	21.9	1.6	2.1547194	146	19	day
137	20/08/2022 20:00	sand	0.648	NA	20.5	1.6	0.0410806	146.2	20	night
138	20/08/2022 21:00	sand	0.576	NA	19.5	1.6	-0.036251	146.2	21	night
139	20/08/2022 22:00	sand	0.792	NA	18.8	1.6	-0.0390228	146.8	22	night
140	20/08/2022 23:00	sand	0.828	NA	18.8	1.6	-0.0387338	147	23	night
141	21/08/2022 00:00	sand	0.792	NA	18.6	1.6	-0.0436914	147	0	night
142	21/08/2022 01:00	sand	0.612	NA	18.2	1.5	-0.0403614	147	1	night
143	21/08/2022 02:00	sand	0.54	NA	17.2	1.5	-0.0420904	147.2	2	night
144	21/08/2022 03:00	sand	0.36	NA	16.2	1.6	-0.0415088	148	3	night
145	21/08/2022 04:00	sand	0.504	NA	15.4	1.6	-0.0397186	148	4	night
146	21/08/2022 05:00	sand	0.648	NA	15.4	1.5	0.362922	148	5	night
147	21/08/2022 06:00	sand	0.72	NA	16.7	1.5	3.718673	148	6	day
148	21/08/2022 07:00	sand	1.008	NA	17.9	1.5	11.1126308	148	7	day
149	21/08/2022 08:00	sand	1.152	NA	20.5	1.6	24.402234	148	8	day
150	21/08/2022 09:00	sand	1.152	NA	22.6	1.6	34.476492	148	9	day
151	21/08/2022 10:00	sand	1.08	NA	24.4	0	47.753128	148	10	day
152	21/08/2022 11:00	sand	1.44	NA	29.2	0	58.8856152	148	11	day
153	21/08/2022 12:00	sand	0.72	NA	31.1	0	32.954826	148	12	day
154	21/08/2022 13:00	sand	0.576	NA	30.4	0	39.2489636	148	13	day
155	21/08/2022 14:00	sand	0.648	NA	32.7	0	27.70318	148	14	day
156	21/08/2022 15:00	sand	1.188	NA	32.7	0	36.900656	148	15	day
157	21/08/2022 16:00	sand	0.576	NA	30.4	1.6	14.5208332	148	16	day
158	21/08/2022 17:00	sand	0.684	NA	28.6	1.6	16.8153128	148	17	day
159	21/08/2022 18:00	sand	0.432	NA	25.9	1.6	11.729076	148	18	day
160	21/08/2022 19:00	sand	0.504	NA	23.5	1.6	1.8557884	148	19	day
161	21/08/2022 20:00	sand	0.432	NA	21.5	1.6	0.0045036	148	20	night
162	21/08/2022 21:00	sand	0.54	NA	19.9	1.6	-0.041016	148	21	night
163	21/08/2022 22:00	sand	0.36	NA	18.8	1.6	-0.0416294	148	22	night
164	21/08/2022 23:00	sand	0.36	NA	17.9	1.5	-0.0421144	147.6	23	night
165	22/08/2022 00:00	sand	0.612	NA	16.8	1.5	-0.0439384	147	0	night
166	22/08/2022 01:00	sand	-0.216	NA	16	1.6	-0.0409612	147	1	night
167	22/08/2022 02:00	sand	0.288	NA	15.4	1.5	-0.0428946	147	2	night
168	22/08/2022 03:00	sand	0.108	NA	14.9	1.5	-0.0405984	147	3	night
169	22/08/2022 04:00	sand	-0.108	NA	14.7	1.3	-0.040203	146.6	4	night
170	22/08/2022 05:00	sand	0.252	NA	14.4	1.3	0.2316998	146	5	night
171	18/08/2022 16:00	vegetation	5.76	NA	32.7	0.3	15.534062	140.2	16	day
172	18/08/2022 17:00	vegetation	5.616	NA	30.4	0.8	7.0706524	140	17	day
173	18/08/2022 18:00	vegetation	6.336	NA	26.9	0.5	1.984103	140	18	day
174	18/08/2022 19:00	vegetation	5.472	NA	25.6	0.2	0.56933	140	19	day
175	18/08/2022 20:00	vegetation	5.544	NA	25.1	0.5	-0.0203738	139.2	20	night
176	18/08/2022 21:00	vegetation	5.58	NA	24.4	0.5	-0.0348574	139	21	night
177	18/08/2022 22:00	vegetation	7.524	NA	23	0.8	-0.0368398	139	22	night
178	18/08/2022 23:00	vegetation	6.588	NA	22.6	0.6	-0.0405012	139	23	night
179	19/08/2022 00:00	vegetation	7.416	NA	22.4	0	-0.0408924	139	0	night
180	19/08/2022 01:00	vegetation	6.768	NA	21.9	0	-0.0375062	139	1	night
181	19/08/2022 02:00	vegetation	7.488	NA	21.5	0	-0.0394386	139	2	night
182	19/08/2022 03:00	vegetation	7.56	NA	21.1	0.4	-0.0402256	139	3	night
183	19/08/2022 04:00	vegetation	6.552	NA	20.9	2.1	-0.0392626	139	4	night
184	19/08/2022 05:00	vegetation	8.352	NA	20.5	2.6	0.1097552	139	5	night
185	19/08/2022 06:00	vegetation	9.612	NA	20.9	2.2	1.578905	139	6	day
186	19/08/2022 07:00	vegetation	9.936	NA	21.5	1.9	2.9497172	138.8	7	day
187	19/08/2022 08:00	vegetation	10.044	NA	21.7	2.3	2.8499808	139	8	day
188	19/08/2022 09:00	vegetation	10.332	NA	21.9	2.3	10.0347614	138.6	9	day
189	19/08/2022 10:00	vegetation	10.332	NA	22.1	2.3	10.4711294	138	10	day
190	19/08/2022 11:00	vegetation	11.7	NA	24.2	2.4	27.052506	138	11	day
191	19/08/2022 12:00	vegetation	11.844	NA	24.9	2.4	36.6895724	138.4	12	day
192	19/08/2022 13:00	vegetation	11.592	NA	24.7	2.3	30.5633644	138.6	13	day
193	19/08/2022 14:00	vegetation	10.908	NA	24.4	2.3	29.1873604	138.2	14	day
194	19/08/2022 15:00	vegetation	10.224	NA	23.5	2.6	27.2628592	138.2	15	day
195	19/08/2022 16:00	vegetation	10.476	NA	23.5	2.6	14.5026408	138.2	16	day
196	19/08/2022 17:00	vegetation	9.828	NA	23	2.2	5.5984876	138	17	day
197	19/08/2022 18:00	vegetation	9.576	NA	22.1	2.2	2.2914708	138.2	18	day
198	19/08/2022 19:00	vegetation	8.676	NA	20.9	1.9	0.585089	138.2	19	day
199	19/08/2022 20:00	vegetation	8.748	NA	20.9	1.9	-0.0012416	138.4	20	night
200	19/08/2022 21:00	vegetation	8.748	NA	20.5	1.9	-0.0350566	138.8	21	night
201	19/08/2022 22:00	vegetation	8.496	NA	20.1	1.8	-0.0394862	139	22	night
202	19/08/2022 23:00	vegetation	8.244	NA	20.1	1.8	-0.039243	139	23	night
203	20/08/2022 00:00	vegetation	8.316	NA	20.1	1.8	-0.0365868	139.2	0	night
204	20/08/2022 01:00	vegetation	7.884	NA	19.7	1.8	-0.0359512	139.8	1	night
205	20/08/2022 02:00	vegetation	7.236	NA	19.5	1.8	-0.0382364	140	2	night
206	20/08/2022 03:00	vegetation	7.776	NA	19.3	1.8	-0.0432838	140.2	3	night
207	20/08/2022 04:00	vegetation	6.84	NA	19.3	2.6	-0.0409704	141	4	night
208	20/08/2022 05:00	vegetation	7.524	NA	19.5	2.3	0.3717996	141	5	night
209	20/08/2022 06:00	vegetation	8.208	NA	20.7	2.6	3.5435212	141.6	6	day
210	20/08/2022 07:00	vegetation	8.316	NA	22.1	2.7	9.7079218	142.2	7	day
211	20/08/2022 08:00	vegetation	8.784	NA	23.3	3	21.8073544	143	8	day
212	20/08/2022 09:00	vegetation	8.82	NA	23.9	2.7	14.3921964	143	9	day
213	20/08/2022 10:00	vegetation	9.576	NA	25.1	2.4	18.5262836	143.6	10	day
214	20/08/2022 11:00	vegetation	9.252	NA	25.6	2.7	27.490592	143.8	11	day
215	20/08/2022 12:00	vegetation	9.108	NA	25.9	2.7	16.8339132	144	12	day
216	20/08/2022 13:00	vegetation	8.928	NA	26.2	2.7	19.0316012	144.8	13	day
217	20/08/2022 14:00	vegetation	8.532	NA	26.4	2.4	24.4559656	145	14	day
218	20/08/2022 15:00	vegetation	8.172	NA	24.9	2.4	26.110268	145.2	15	day
219	20/08/2022 16:00	vegetation	7.632	NA	23.7	2	16.5966724	145.4	16	day
220	20/08/2022 17:00	vegetation	7.056	NA	23	2.3	11.3255964	145.2	17	day
221	20/08/2022 18:00	vegetation	6.408	NA	22.4	2.3	8.820762	146	18	day
222	20/08/2022 19:00	vegetation	5.868	NA	20.5	2.2	2.1547194	146	19	day
223	20/08/2022 20:00	vegetation	6.228	NA	19.3	2.2	0.0410806	146.2	20	night
224	20/08/2022 21:00	vegetation	5.364	NA	18.4	2.5	-0.036251	146.2	21	night
225	20/08/2022 22:00	vegetation	6.012	NA	18	2.5	-0.0390228	146.8	22	night
226	20/08/2022 23:00	vegetation	6.012	NA	17.9	2.1	-0.0387338	147	23	night
227	21/08/2022 00:00	vegetation	5.652	NA	17.9	2.1	-0.0436914	147	0	night
228	21/08/2022 01:00	vegetation	5.184	NA	17.5	2.1	-0.0403614	147	1	night
229	21/08/2022 02:00	vegetation	5.076	NA	16.7	1.8	-0.0420904	147.2	2	night
230	21/08/2022 03:00	vegetation	4.788	NA	15.5	2.1	-0.0415088	148	3	night
231	21/08/2022 04:00	vegetation	4.86	NA	14.9	1.8	-0.0397186	148	4	night
232	21/08/2022 05:00	vegetation	4.824	NA	15	1.8	0.362922	148	5	night
233	21/08/2022 06:00	vegetation	5.076	NA	17	2.2	3.718673	148	6	day
234	21/08/2022 07:00	vegetation	5.688	NA	20.5	2.2	11.1126308	148	7	day
235	21/08/2022 08:00	vegetation	6.948	NA	26.7	2.7	24.402234	148	8	day
236	21/08/2022 09:00	vegetation	7.668	NA	31.4	3.1	34.476492	148	9	day
237	21/08/2022 10:00	vegetation	7.164	NA	34.6	3.1	47.753128	148	10	day
238	21/08/2022 11:00	vegetation	7.704	NA	35.7	3.5	58.8856152	148	11	day
239	21/08/2022 12:00	vegetation	7.128	NA	33.1	2.8	32.954826	148	12	day
240	21/08/2022 13:00	vegetation	6.336	NA	29.8	2.4	39.2489636	148	13	day
241	21/08/2022 14:00	vegetation	6.012	NA	31.1	2.7	27.70318	148	14	day
242	21/08/2022 15:00	vegetation	6.084	NA	29.2	2.6	36.900656	148	15	day
243	21/08/2022 16:00	vegetation	5.976	NA	26.7	2.6	14.5208332	148	16	day
244	21/08/2022 17:00	vegetation	5.724	NA	25.4	2.2	16.8153128	148	17	day
245	21/08/2022 18:00	vegetation	5.004	NA	23.5	1.8	11.729076	148	18	day
246	21/08/2022 19:00	vegetation	5.652	NA	21.3	1.8	1.8557884	148	19	day
247	21/08/2022 20:00	vegetation	4.716	NA	19.5	2	0.0045036	148	20	night
248	21/08/2022 21:00	vegetation	4.212	NA	18	2	-0.041016	148	21	night
249	21/08/2022 22:00	vegetation	4.32	NA	17.2	2.3	-0.0416294	148	22	night
250	21/08/2022 23:00	vegetation	3.924	NA	16.7	2	-0.0421144	147.6	23	night
251	22/08/2022 00:00	vegetation	3.816	NA	15.8	2	-0.0439384	147	0	night
252	22/08/2022 01:00	vegetation	3.708	NA	15	2	-0.0409612	147	1	night
253	22/08/2022 02:00	vegetation	3.888	NA	14.6	2	-0.0428946	147	2	night
254	22/08/2022 03:00	vegetation	3.24	NA	14	2.2	-0.0405984	147	3	night
255	22/08/2022 04:00	vegetation	3.24	NA	14.6	2	-0.040203	146.6	4	night
256	22/08/2022 05:00	vegetation	3.564	NA	14.4	2.2	0.2316998	146	5	night
257	22/08/2022 06:00	vegetation	4.212	NA	17.2	2	2.4908548	146	6	day
258	19/08/2022 15:00	water	NA	0.052387097	23.27513115	NA	27.2628592	138.2	15	day
259	19/08/2022 16:00	water	1.600198047	0.053	23.23934426	NA	14.5026408	138.2	16	day
260	19/08/2022 17:00	water	1.603668138	0.052983607	23.21380328	NA	5.5984876	138	17	day
261	19/08/2022 18:00	water	1.736498589	0.052278689	23.16527869	NA	2.2914708	138.2	18	day
262	19/08/2022 19:00	water	2.061829369	0.052016393	23.08803279	NA	0.585089	138.2	19	day
263	19/08/2022 20:00	water	2.318413614	0.052	23.02040984	NA	-0.0012416	138.4	20	night
264	19/08/2022 21:00	water	2.636439279	0.052	22.9647377	NA	-0.0350566	138.8	21	night
265	19/08/2022 22:00	water	2.967089219	0.05204918	22.88401639	NA	-0.0394862	139	22	night
266	19/08/2022 23:00	water	3.319353844	0.052114754	22.80196721	NA	-0.039243	139	23	night
267	20/08/2022 00:00	water	3.7650625	0.052262295	22.72491803	NA	-0.0365868	139.2	0	night
268	20/08/2022 01:00	water	4.177223183	0.052557377	22.64162295	NA	-0.0359512	139.8	1	night
269	20/08/2022 02:00	water	4.606743393	0.052868852	22.56719672	NA	-0.0382364	140	2	night
270	20/08/2022 03:00	water	4.984959849	0.052819672	22.49263934	NA	-0.0432838	140.2	3	night
271	20/08/2022 04:00	water	5.396911231	0.052934426	22.41995082	NA	-0.0409704	141	4	night
272	20/08/2022 05:00	water	5.769103243	0.05295082	22.35918033	NA	0.3717996	141	5	night
273	20/08/2022 06:00	water	5.960534384	0.053	22.33447541	NA	3.5435212	141.6	6	day
274	20/08/2022 07:00	water	5.849948343	0.052918033	22.36204918	NA	9.7079218	142.2	7	day
275	20/08/2022 08:00	water	5.617972823	0.053147541	22.3967377	NA	21.8073544	143	8	day
276	20/08/2022 09:00	water	5.208851952	0.053704918	22.45752459	NA	14.3921964	143	9	day
277	20/08/2022 10:00	water	4.674546336	0.053819672	22.52403279	NA	18.5262836	143.6	10	day
278	20/08/2022 11:00	water	4.008455512	0.05304918	22.6092459	NA	27.490592	143.8	11	day
279	20/08/2022 12:00	water	3.463119099	0.052836066	22.67657377	NA	16.8339132	144	12	day
280	20/08/2022 13:00	water	2.941271201	0.052344262	22.73834426	NA	19.0316012	144.8	13	day
281	20/08/2022 14:00	water	2.50982509	0.052721311	22.78811475	NA	24.4559656	145	14	day
282	20/08/2022 15:00	water	2.147367177	0.053	22.7994918	NA	26.110268	145.2	15	day
283	20/08/2022 16:00	water	1.91136012	0.053	22.76629508	NA	16.5966724	145.4	16	day
284	20/08/2022 17:00	water	1.907317838	0.052983607	22.72263934	NA	11.3255964	145.2	17	day
285	20/08/2022 18:00	water	2.037877861	0.052245902	22.6632459	NA	8.820762	146	18	day
286	20/08/2022 19:00	water	2.291872372	0.052	22.60559016	NA	2.1547194	146	19	day
287	20/08/2022 20:00	water	2.694803814	0.05204918	22.53916393	NA	0.0410806	146.2	20	night
288	20/08/2022 21:00	water	3.021665015	0.052114754	22.47013115	NA	-0.036251	146.2	21	night
289	20/08/2022 22:00	water	3.494162681	0.052229508	22.39967213	NA	-0.0390228	146.8	22	night
290	20/08/2022 23:00	water	3.943707628	0.052721311	22.32498361	NA	-0.0387338	147	23	night
291	21/08/2022 00:00	water	4.313024114	0.05295082	22.2577377	NA	-0.0436914	147	0	night
292	21/08/2022 01:00	water	4.594741536	0.05295082	22.18872131	NA	-0.0403614	147	1	night
293	21/08/2022 02:00	water	4.850051141	0.052983607	22.11922951	NA	-0.0420904	147.2	2	night
294	21/08/2022 03:00	water	5.071843003	0.053	22.02877049	NA	-0.0415088	148	3	night
295	21/08/2022 04:00	water	5.369882673	0.053065574	21.92322951	NA	-0.0397186	148	4	night
296	21/08/2022 05:00	water	5.650596175	0.053278689	21.82827869	NA	0.362922	148	5	night
297	21/08/2022 06:00	water	5.839624985	0.053508197	21.7687377	NA	3.718673	148	6	day
298	21/08/2022 07:00	water	5.915075796	0.053540984	21.75472131	NA	11.1126308	148	7	day
299	21/08/2022 08:00	water	5.640987508	0.053983607	21.87604918	NA	24.402234	148	8	day
300	21/08/2022 09:00	water	5.028457711	0.054	22.09668852	NA	34.476492	148	9	day
301	21/08/2022 10:00	water	4.35013979	0.053196721	22.40488525	NA	47.753128	148	10	day
302	21/08/2022 11:00	water	3.655622763	0.052770492	22.71613115	NA	58.8856152	148	11	day
303	21/08/2022 12:00	water	3.047352952	0.051983607	22.92770492	NA	32.954826	148	12	day
304	21/08/2022 13:00	water	NA	0.051163934	23.09432787	NA	39.2489636	148	13	day
305	21/08/2022 14:00	water	2.043313872	0.050491803	NA	NA	27.70318	148	14	day
306	21/08/2022 15:00	water	NA	0.051016393	NA	NA	36.900656	148	15	day
307	21/08/2022 16:00	water	1.13111	0.051770492	NA	NA	14.5208332	148	16	day
308	21/08/2022 17:00	water	0.951426396	0.052	NA	NA	16.8153128	148	17	day
309	21/08/2022 18:00	water	0.800545105	0.052032787	23.30231148	NA	11.729076	148	18	day
310	21/08/2022 19:00	water	0.921375331	0.052295082	23.20278689	NA	1.8557884	148	19	day
311	21/08/2022 20:00	water	1.263238619	0.052918033	23.10245902	NA	0.0045036	148	20	night
312	21/08/2022 21:00	water	1.561322012	0.053	22.97859677	NA	-0.041016	148	21	night
313	21/08/2022 22:00	water	1.735870663	0.053032787	22.86613115	NA	-0.0416294	148	22	night
314	21/08/2022 23:00	water	2.089331021	0.053180328	22.76608197	NA	-0.0421144	147.6	23	night
315	22/08/2022 00:00	water	2.31615009	0.053737705	22.64688525	NA	-0.0439384	147	0	night
316	22/08/2022 01:00	water	2.457474925	0.054	22.5165082	NA	-0.0409612	147	1	night
317	22/08/2022 02:00	water	3.094073404	0.054098361	22.36621311	NA	-0.0428946	147	2	night
318	22/08/2022 03:00	water	3.106340781	0.054786885	22.19960656	NA	-0.0405984	147	3	night
319	22/08/2022 04:00	water	3.566733904	0.055	22.03881967	NA	-0.040203	146.6	4	night
320	22/08/2022 05:00	water	3.980946637	NA	21.88327869	NA	0.2316998	146	5	night
321	22/08/2022 06:00	water	4.514571028	NA	21.76585246	NA	2.4908548	146	6	day
